# Supplementary material for: The phosphodiesterase 10 inhibitor papaverine exerts anti-inflammatory and neuroprotective effects via the PKA signaling pathway in neuroinflammation and Parkinson’s disease mouse models
Source: PubMed Central journal article supplement (PMC6888927; doi:10.1186/s12974-019-1649-3), 2019-12-02
Supplement: 12974_2019_1649_MOESM1_ESM.pdf [file 12974_2019_1649_MOESM1_ESM.pdf]

**Supplementary Table 1.** List of primary antibodies used in western blot analysis

| <b>Antigen</b> | <b>Manufacturer</b> | <b>Catalog number</b> | <b>Dilution</b> |
|----------------|---------------------|-----------------------|-----------------|
| $\beta$ -actin | Sigma               | A1978                 | 1:10000         |
| Akt            | Cell signaling      | 9272                  | 1:2000          |
| p-Akt          | Cell signaling      | 9271                  | 1:2000          |
| Bcl2           | Abcam               | ab59348               | 1:3000          |
| BDNF           | Sigma               | SAB2108004            | 1:2000          |
| CREB           | Cell signaling      | 9197                  | 1:2000          |
| p-CREB         | Cell signaling      | 9198                  | 1:1000          |
| ERK            | Cell signaling      | 9102                  | 1:2000          |
| p-ERK          | Cell signaling      | 9101                  | 1:2000          |
| GDNF           | Abcam               | ab18956               | 1:1000          |
| Iba-1          | Wako                | 019-19741             | 1:1000          |
| IL-1 $\beta$   | R&D                 | AF-401-NA             | 1:1000          |
| IL-10          | Abcam               | 9969                  | 1:1000          |
| iNOS           | BD bioscience       | 610431                | 1:1000          |
| JNK            | Cell signaling      | 9252                  | 1:2000          |
| p-JNK          | Cell signaling      | 9251                  | 1:2000          |
| Lamin A        | Santa Cruz          | 20680                 | 1:1000          |
| PDE10A         | Santa Cruz          | 515023                | 1:1000          |
| PGC-1 $\alpha$ | Millipore           | ST1202                | 1:1000          |
| p38            | Cell signaling      | 9212                  | 1:2000          |
| p-p38          | Cell signaling      | 9211                  | 1:2000          |
| p-p47 phox     | Assaybiotech        | A8391                 | 1:1000          |
| TH             | Santa Cruz          | 14007                 | 1:2000          |
| TNF- $\alpha$  | Santa Cruz          | 1350                  | 1:500           |

**Supplementary Table 2.** List of primary antibodies used in immunohistochemical and immunofluorescence staining

| <b>Antigen</b> | <b>Manufacturer</b> | <b>Catalog number</b> | <b>Dilution</b> |
|----------------|---------------------|-----------------------|-----------------|
| GDNF           | Abcam               | ab18956               | 1:300           |
| CD11b (OX-42)  | Santa Cruz          | 28664                 | 1:500           |
| p-CREB         | Cell signaling      | 9198                  | 1:2000          |
| Iba-1          | Wako                | 019-19741             | 1:500           |
| PGC-1 $\alpha$ | Millipore           | ST1202                | 1:2000          |
| TH             | Santa Cruz          | 14007                 | 1:1000          |
